# Supplementary material for: Highly uniform hierarchical Zn2SnO4 microspheres for the construction of high performance dye-sensitized solar cells
Source: Royal Society of Chemistry journal article supplement (doi:10.1039/c7ra06906e), 2017-01-01
Supplement: c7ra06906e1.pdf [file c7ra06906e1.pdf]

## Electronic Supplementary Information

### Highly Uniform Hierarchical Zn<sub>2</sub>SnO<sub>4</sub> Microspheres Constructing High Performance Dye-Sensitized Solar Cells †

Xin Wang,<sup>ab</sup> Yu-Fen Wang,<sup>\*ab</sup> Qiu-Ping Luo,<sup>c</sup> Jian-Hua Ren,<sup>ab</sup> De-Jun Li,<sup>ab</sup> and Xi-Fei Li<sup>\*ab</sup>

Materials, Tianjin 300387, China.

<sup>a</sup> Energy & Materials Engineering Center, College of Physics and Materials Science, Tianjin Normal University, Tianjin 300387, China. E-mail: [xfli@mail.tjnu.edu.cn](mailto:xfli@mail.tjnu.edu.cn), [yfwang@mail.tjnu.edu.cn](mailto:yfwang@mail.tjnu.edu.cn)

<sup>b</sup> Tianjin International Joint Research Center of Surface Technology for Energy Storage Materials, Tianjin 300387, China.

<sup>c</sup> Laboratory of Optical Information Technology, School of Science, Wuhan Institute of Technology, Wuhan 430205, China.

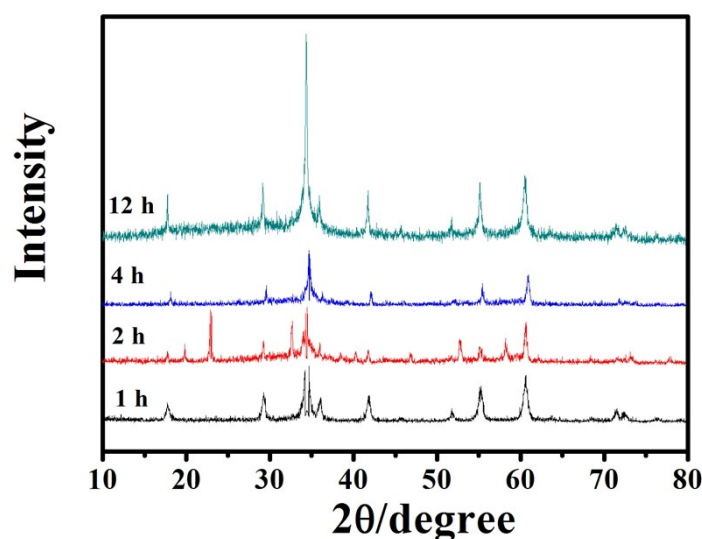

**Fig. S1.** The XRD patterns of the Zn<sub>2</sub>SnO<sub>4</sub> microspheres synthesized at different hydrothermal time
